# Supplementary material for: Yersinia Virulence Factor YopM Induces Sustained RSK Activation by Interfering with Dephosphorylation
Source: PLOS journal article supplement (doi:10.1371/journal.pone.0013165), 2010-10-05
Supplement: S1 (10.1371/journal.pone.0013165.s001) [file journal.pone.0013165.s001]

Suppl. Fig. S1

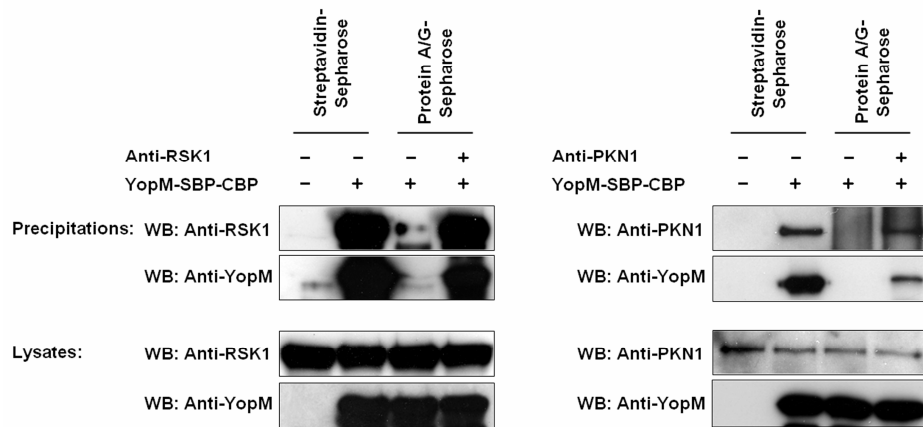

Supplementary Fig. S1: J774A.1 cells were left uninfected (lane 1 left and right panel) or were infected with deltaYopM(pYopM-CBP-SBP) and lysates were prepared 90 minutes after infection. Lysates were then incubated with 20 µl of Streptavidine-sepharose or Protein A/G sepharose and the precipitates and aliquots of the lysates before immunoprecipitation were analyzed by western blotting with the indicated antibodies.
