# Supplementary material for: Yersinia Virulence Factor YopM Induces Sustained RSK Activation by Interfering with Dephosphorylation
Source: PLOS journal article supplement (doi:10.1371/journal.pone.0013165), 2010-10-05
Supplement: S2 (10.1371/journal.pone.0013165.s002) [file journal.pone.0013165.s002]

**Suppl. Fig. S2**

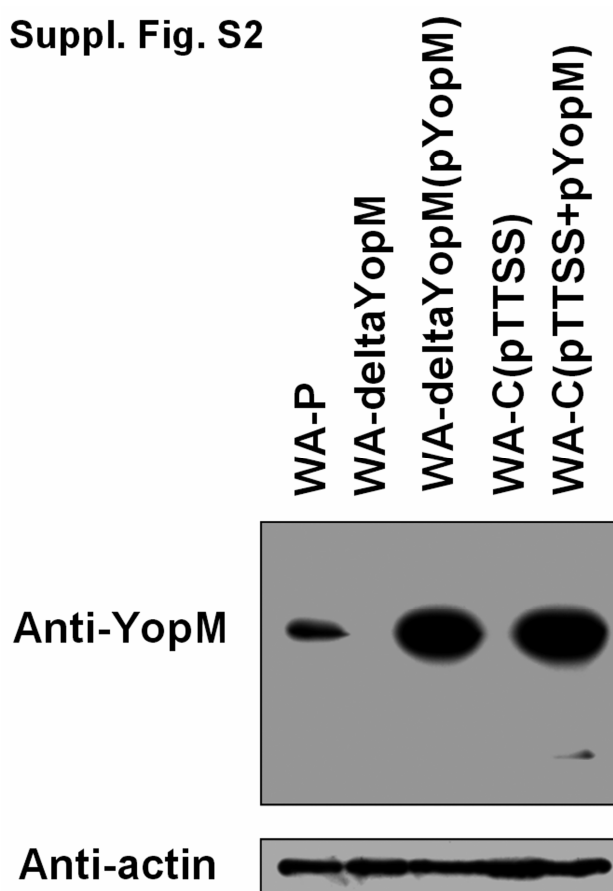

Supplementary Fig. S2: Analysis of YopM quantities translocated into J774.1 cells by different *Yersinia* strains. J774.1 cells were infected with WA-P, WA-deltaYopM, WA-deltaYopM(pYopM), WA-C(pTTSS) and WA-C(pTTSS+YopM) and harvested after 90 min. Cellular lysates were then subjected to western blotting and probed with the indicated antibodies.
